# Supplementary material for: Mutations in Structural Genes of the Mitochondrial Complex IV May Influence Breast Cancer
Source: MDPI journal article supplement (doi:10.3390/genes14071465), 2023-07-18
Supplement: s1 [file s1]

## SUPPLEMENTARY MATERIAL

**Supplementary Table S1** – Alterations found in mitochondrial DNA, displaying their location and the existence of reporting in dbSNP or global literature.

| Gene          | Type           | Locus      | dbSNP        | Reference |
|---------------|----------------|------------|--------------|-----------|
| <i>MT-COI</i> | nsSNP          | m.5913G>A  | rs201617272  | -         |
|               | nsSNP          | m.5917G>A  | -            | -         |
|               | nsSNP          | m.5920G>A  | rs199476129  | [64]      |
|               | synSNP         | m.5945C>T  | rs1603220196 | -         |
|               | nsSNP          | m.5950G>A  | -            | -         |
|               | nsSNP          | m.5967T>C* | -            | -         |
|               | nsSNP          | m.5997G>A  | -            | -         |
|               | synSNP         | m.6023G>A  | rs1603220229 | -         |
|               | nsSNP          | m.6028G>A  | rs28580752   | -         |
|               | nsSNP          | m.6057C>T  | -            | -         |
|               | nsSNP          | m.6061T>C  | rs1603220252 | -         |
|               | nsSNP          | m.6102T>C  | -            | -         |
|               | nsSNP          | m.6111G>A  | -            | -         |
|               | nsSNP          | m.6117C>T  | -            | -         |
|               | nsSNP          | m.6174G>A  | rs1603220303 | -         |
|               | nsSNP          | m.6193T>C  | -            | -         |
|               | nsSNP          | m.6202T>C  | -            | -         |
|               | Frameshift Ins | m.6218+C   | -            | -         |
|               | nsSNP          | m.6225T>C  | rs1603220329 | -         |
|               | synSNP         | m.6227T>C  | rs1556423092 | -         |
|               | nsSNP          | m.6235T>A  | -            | -         |
|               | nsSNP          | m.6253T>C  | rs200165736  | -         |
|               | nsSNP          | m.6258G>C  | -            | -         |
|               | synSNP         | m.6260G>A  | rs201395766  | [99]      |
|               | synSNP         | m.6305G>A  | rs879141792  | -         |
|               | nsSNP          | m.6337T>C  | rs1603220425 | -         |
|               | nsSNP          | m.6346T>C  | -            | -         |
|               | nsSNP          | m.6358T>C  | rs1603220439 | -         |
|               | nsSNP          | m.6457T>C  | -            | -         |
|               | nsSNP          | m.6480G>A  | rs199476128  | [65]      |
|               | nsSNP          | m.6481T>C  | rs28721398   | -         |
|               | nsSNP          | m.6513G>C  | -            | -         |
|               | nsSNP          | m.6580G>A* | -            | -         |
|               | synSNP         | m.6620T>C  | -            | -         |
|               | nsSNP          | m.6637T>C  | -            | -         |

|        |            |              |          |
|--------|------------|--------------|----------|
| nsSNP  | m.6646T>C  | -            | -        |
| nsSNP  | m.6673T>C  | -            | -        |
| nsSNP  | m.6684T>C  | -            | -        |
| nsSNP  | m.6723G>A  | rs1603220595 | -        |
| nsSNP  | m.6724T>C  | rs28393263   | -        |
| nsSNP  | m.6760T>C  | -            | -        |
| synSNP | m.6776T>C  | rs41473545   | -        |
| nsSNP  | m.6798G>A* | -            | -        |
| nsSNP  | m.6822T>C  | rs1603220640 | -        |
| nsSNP  | m.6825G>A  | rs1603220642 | -        |
| nsSNP  | m.6838T>C  | -            | -        |
| nsSNP  | m.6931G>A* | -            | -        |
| nsSNP  | m.6933T>C  | rs1603220698 | -        |
| nsSNP  | m.6937T>C  | rs1603220701 | -        |
| nsSNP  | m.6976T>C  | -            | -        |
| nsSNP  | m.7008G>A  | -            | -        |
| synSNP | m.7022T>C  | rs879059323  | -        |
| synSNP | m.7028C>T* | -            | -        |
| nsSNP  | m.7032T>C  | rs1603220739 | -        |
| nsSNP  | m.7045T>C  | -            | -        |
| synSNP | m.7049A>G  | rs1603220745 | -        |
| nsSNP  | m.7056G>A  | rs1556423224 | -        |
| nsSNP  | m.7074G>A  | -            | -        |
| nsSNP  | m.7078G>A  | -            | -        |
| nsSNP  | m.7092T>C  | -            | -        |
| nsSNP  | m.7119G>A  | rs1556423235 | -        |
| nsSNP  | m.7142T>G  | -            | -        |
| synSNP | m.7151C>T  | rs1603220804 | -        |
| nsSNP  | m.7153T>G  | -            | -        |
| nsSNP  | m.7191T>C  | rs1603220824 | -        |
| nsSNP  | m.7201T>C  | -            | -        |
| nsSNP  | m.7219G>A  | -            | -        |
| nsSNP  | m.7242T>C  | -            | -        |
| nsSNP  | m.7258T>C* | rs1556423260 | -        |
| synSNP | m.7268T>C  | -            | -        |
| nsSNP  | m.7275T>C* | rs267606884  | [66, 67] |
| nsSNP  | m.7312T>C* | -            | -        |
| synSNP | m.7325A>G  | rs1556423269 | -        |
| nsSNP  | m.7332G>C  | rs1603220889 | -        |

|               |                |               |              |              |
|---------------|----------------|---------------|--------------|--------------|
|               | synSNP         | m.7334T>C     | rs2068702871 | -            |
|               | Frameshift Ins | m.7396+CCCCCC | rs1603220944 | -            |
|               | synSNP         | m.7403A>C*    | rs386829006  | -            |
| <i>MT-CO2</i> | nsSNP          | m.7595G>A     | -            | -            |
|               | synSNP         | m.7609T>C     | rs1603221036 | -            |
|               | nsSNP          | m.7652T>C     | -            | -            |
|               | nsSNP          | m.7658G>A     | -            | -            |
|               | nsSNP          | m.7778T>C     | -            | -            |
|               | nsSNP          | m.7803T>C     | -            | -            |
|               | nsSNP          | m.7809T>C     | -            | -            |
|               | synSNP         | m.7849C>T     | rs386829015  | -            |
|               | nsSNP          | m.7869T>C     | -            | -            |
|               | nsSNP          | m.7902G>A     | -            | -            |
|               | nsSNP          | m.7935T>C*    | rs1603221222 | -            |
|               | nsSNP          | m.7936C>A     | -            | -            |
|               | nsSNP          | m.7976G>A     | rs377368526  | -            |
|               | nsSNP          | m.7977G>A     | -            | -            |
|               | nsSNP          | m.7986G>A     | -            | -            |
|               | nsSNP          | m.8027G>A     | rs1116904    | -            |
|               | nsSNP          | m.8072T>C     | -            | -            |
|               | nsSNP          | m.8088T>C     | -            | -            |
|               | nsSNP          | m.8153G>A     | -            | -            |
|               | nsSNP          | m.8213G>A     | -            | -            |
|               | nsSNP          | m.8219G>A     | -            | -            |
|               | nsSNP          | m.8225A>G     | rs1603221335 | -            |
|               | nsSNP          | m.8243G>A     | -            | -            |
|               | nsSNP          | m.8249G>A     | -            | -            |
| <i>MT-CO3</i> | nsSNP          | m.9264G>A     | -            | -            |
|               | synSNP         | m.9266G>A     | rs374335946  | -            |
|               | nsSNP          | m.9267G>A     | rs1556423650 | -            |
|               | nsSNP          | m.9285A>T     | -            | -            |
|               | nsSNP          | m.9326A>T     | -            | -            |
|               | Frameshift Ins | m.9335+AT     | -            | -            |
|               | nsSNP          | m.9438G>A     | rs267606611  | [74, 75, 76] |
|               | Frameshift Del | m.9477-T**    | -            | -            |
|               | synSNP         | m.9494A>G     | rs1556423680 | -            |
|               | nsSNP          | m.9500C>A     | -            | -            |
|               | Frameshift Ins | m.9531+CCCCCC | rs267606614  | [77]         |

|       |            |              |   |
|-------|------------|--------------|---|
| nsSNP | m.9643G>A  | -            | - |
| nsSNP | m.9645G>A* | -            | - |
| nsSNP | m.9658T>C  | -            | - |
| nsSNP | m.9720T>C  | -            | - |
| nsSNP | m.9753G>A  | rs1569484322 | - |
| nsSNP | m.9832T>C  | -            | - |
| nsSNP | m.9850T>C  | rs1603222543 | - |
| nsSNP | m.9906G>A  | -            | - |
| nsSNP | m.9912G>A  | rs28580363   | - |
| nsSNP | m.9918G>C  | -            | - |
| nsSNP | m.9979G>A  | rs1603222604 | - |
| nsSNP | m.9985G>A  | -            | - |

*nsSNP = non-synonymous single nucleotide polymorphisms; synSNP = synonymous single nucleotide polymorphisms; Frameshift Ins = Frameshift Insertion; Frameshift Del = Frameshift Deletion.*

*- = not reported in the literature (Unreported).*

*\* One repetition of the change (n=2)*

*\*\* Two repetitions of the change (n=3)*

**Supplementary Table S2** – Characterization of alterations found in COX nuclear genes.

| Gene   | Alteration | Locus        | Type                  | Impact   | dbSNP        |
|--------|------------|--------------|-----------------------|----------|--------------|
| COX4I1 | +T         | 16:85839347  | <i>Frameshift Ins</i> | High     | -            |
|        | C>T        | 16:85840354  | <i>Silent</i>         | Low      | -            |
|        | C>T        | 16:85840355  | <i>Missense</i>       | Moderate | -            |
| COX4I2 | G>A        | 20:30227749  | <i>Silent</i>         | Low      | rs1050846788 |
|        | G>A        | 20:30227833  | <i>Silent</i>         | Low      | -            |
|        | A>G        | 20:30227892  | <i>Missense</i>       | Moderate | -            |
|        | G>A        | 20:30227901  | <i>Splice site</i>    | High     | -            |
|        | C>A        | 20:30232760  | <i>UTR 3' prime</i>   | Modifier | rs774033084  |
| COX5A  | G>A        | 15:75221511  | <i>Missense</i>       | Moderate | rs780396486  |
| COX5B  | G>C        | 2:98262600   | <i>Silent</i>         | Low      | -            |
|        | C>A        | 2:98262609   | <i>Silent</i>         | Low      | -            |
|        | G>A        | 2:98262630   | <i>Silent</i>         | Low      | -            |
|        | G>T        | 2:98263556   | <i>Missense</i>       | Moderate | -            |
|        | A>G        | 2:98264501   | <i>Missense</i>       | Moderate | -            |
|        | G>A        | 2:98264516   | <i>Missense</i>       | Moderate | rs746587601  |
| COX6A1 | G>A        | 12:120876255 | <i>Silent</i>         | Low      | rs1463183756 |
|        | C>T        | 12:120875960 | <i>Missense</i>       | Moderate | -            |
|        | C>G        | 12:120876217 | <i>Missense</i>       | Moderate | -            |
| COX6A2 | -C         | 31439163     | <i>Frameshift Del</i> | High     | rs769482258  |
|        | C>T        | 31439585     | <i>Missense</i>       | Moderate | rs2082154234 |
| COX6B1 | C>T        | 19:36145521  | <i>Missense</i>       | Moderate | rs1451939305 |
|        | -C         | 19:36145554  | <i>Frameshift Del</i> | High     | -            |
| COX6B2 | G>A        | 19:55865104  | <i>Silent</i>         | Baixa    | -            |
| COX6C  | G>A        | 8:100899731  | <i>UTR 3' prime</i>   | Modifier | -            |
|        | C>A        | 8:100899792  | <i>Missense</i>       | Moderate | rs753969142  |
| COX7A1 | G>C        | 19:36642577  | <i>Silent</i>         | Low      | -            |
|        | -C         | 19:36642366  | <i>Frameshift Del</i> | High     | -            |
| COX7A2 | C>T        | 6:75947625   | <i>UTR 3' prime</i>   | Modifier | rs773507804  |
|        | A>G        | 6:75947696   | <i>Missense</i>       | Moderate | -            |
|        | T>C        | 6:75950100   | <i>Missense</i>       | Moderate | rs771323246  |
| COX7B  | -T         | X:77158195   | <i>Frameshift Del</i> | High     | -            |
|        | G>C        | X:77160724   | <i>Missense</i>       | Moderate | -            |
| COX7B2 | A>C        | 4:46736933   | <i>UTR 3' prime</i>   | Modifier | -            |
|        | C>A        | 4:46736955   | <i>UTR 3' prime</i>   | Modifier | -            |
|        | G>C        | 4:46736959   | <i>UTR 3' prime</i>   | Modifier | rs771248119  |
|        | C>A        | 4:46736981   | <i>Nonsense</i>       | High     | -            |
|        | G>A        | 4:46737164   | <i>Nonsense</i>       | High     | -            |
|        | G>C        | 5:85913930   | <i>Missense</i>       | Moderate | -            |
| COX7C  | G>A        | 5:85915272   | <i>Missense</i>       | Moderate | -            |
|        | G>C        | 5:85915321   | <i>UTR 3' prime</i>   | Modifier | rs1476761587 |
| COX8A  | C>A        | 11:63742117  | <i>UTR 5' prime</i>   | Modifier | -            |

|                                |     |             |                       |          |              |
|--------------------------------|-----|-------------|-----------------------|----------|--------------|
|                                | C>T | 11:63742177 | <i>Silent</i>         | Baixa    | -            |
|                                | A>T | 11:63743764 | <i>Missense</i>       | Moderate | -            |
| <i>COX8C</i>                   | C>T | 14:93813698 | <i>Silent</i>         | Baixa    | rs1389396955 |
| <i>NDUFA4</i>                  | +G  | 7:10978513  | <i>Frameshift Ins</i> | High     | -            |
| Ins, Insertion; Del, Deletion. |     |             |                       |          |              |

**Supplementary Table S3** – Characterization of the phenotypic impact of alterations reported in dbSNP on different predictors of pathogenicity.

| Variant      | Position           | Phenotypic Impact                    |                               |                                |
|--------------|--------------------|--------------------------------------|-------------------------------|--------------------------------|
|              |                    | <i>PolyPhen</i>                      | <i>ClinVar</i>                | <i>SIFT</i>                    |
| rs201617272  | m.5913G>A          | -                                    | <i>Pathogenic</i>             | -                              |
| rs199476129  | m.5920G>A          | -                                    | <i>Pathogenic</i>             | -                              |
| rs28580752   | m.6028G>A          | -                                    | -                             | -                              |
| rs1603220252 | m.6061T>C          | -                                    | <i>Uncertain significance</i> | -                              |
| rs1603220303 | m.6174G>A          | -                                    | <i>Uncertain significance</i> | -                              |
| rs1603220329 | m.6225T>C          | -                                    | -                             | -                              |
| rs200165736  | m.6253T>C          | -                                    | <i>Benign</i>                 | -                              |
| rs1603220425 | m.6337T>C          | -                                    | -                             | -                              |
| rs1603220439 | m.6358T>C          | -                                    | <i>Uncertain significance</i> | -                              |
| rs199476128  | m.6480G>A          | -                                    | <i>Benign</i>                 | -                              |
| rs28721398   | m.6481T>C          | -                                    | <i>Uncertain significance</i> | -                              |
| rs1603220595 | m.6723G>A          | -                                    | <i>Benign</i>                 | -                              |
| rs28393263   | m.6724T>A          | -                                    | -                             | -                              |
| rs1603220640 | m.6822T>C          | -                                    | -                             | -                              |
| rs1603220642 | m.6825G>A          | -                                    | -                             | -                              |
| rs1603220698 | m.6933T>C          | -                                    | -                             | -                              |
| rs1603220701 | m.6937T>C          | -                                    | -                             | -                              |
| rs1603220739 | m.7032T>C          | -                                    | <i>Uncertain significance</i> | -                              |
| rs1556423224 | m.7056G>A          | -                                    | -                             | -                              |
| rs1556423235 | m.7119G>A          | -                                    | <i>Benign</i>                 | -                              |
| rs1603220824 | m.7191T>C          | -                                    | <i>Likely benign</i>          | -                              |
| rs1556423260 | m.7258T>C          | -                                    | <i>Benign</i>                 | -                              |
| rs267606884  | m.7275T>C          | -                                    | <i>Pathogenic</i>             | -                              |
| rs1603220889 | m.7332G>A          | -                                    | <i>Uncertain significance</i> | -                              |
| rs1603220944 | m.7396+CCCC<br>CCC | -                                    | -                             | -                              |
| rs1603221222 | m.7934T>C          | -                                    | -                             | -                              |
| rs377368526  | m.7976G>A          | -                                    | <i>Uncertain significance</i> | -                              |
| rs1116904    | m.8027G>A          | -                                    | <i>Benign</i>                 | -                              |
| rs1603221335 | m.8225A>G          | -                                    | <i>Uncertain significance</i> | -                              |
| rs1556423650 | m.9267G>A          | -                                    | <i>Uncertain significance</i> | -                              |
| rs267606611  | m.9438G>A          | -                                    | <i>Benign/ Pathogenic</i>     | -                              |
| rs267606614  | m.9537+CCCC<br>CCC | -                                    | <i>Pathogenic</i>             | -                              |
| rs1569484322 | m.9752G>A/C        | -                                    | -                             | -                              |
| rs1603222543 | m.9849T>C          | -                                    | -                             | -                              |
| rs28580363   | m.9911G>A          | -                                    | -                             | -                              |
| rs1603222604 | m.9979G>A          | -                                    | -                             | -                              |
| rs774033084  | chr20:30232760     | -                                    | -                             | -                              |
| rs780396486  | chr15:74929170     | <i>Probably Damaging (s = 0.967)</i> | -                             | <i>Deleterious (s = 0.010)</i> |
| rs746587601  | chr2:98264516      | <i>Benign (s = 0.319)</i>            | -                             | <i>Tolerated (s = 0.070)</i>   |
| rs769482258  | chr16:31439163     | <i>Probably Damaging (s = 0.947)</i> | -                             | <i>Deleterious (s = 0.000)</i> |

|                                     |                |                                      |   |                                                 |
|-------------------------------------|----------------|--------------------------------------|---|-------------------------------------------------|
| rs2082154234                        | chr16:31439584 | -                                    | - | -                                               |
| rs1451939305                        | chr19:36145521 | <i>Benign (s = 0.049)</i>            | - | <i>Deleterious (s = 0.030)</i>                  |
| rs753969142                         | chr8:100899792 | <i>Possibly Damaging (s = 0.665)</i> | - | <i>Tolerated (s = 0.00)</i>                     |
| rs773507804                         | chr6:75947625  | -                                    | - | <i>Deleterious - Low Confidence (s = 0.020)</i> |
| rs771323246                         | chr6:75950100  | <i>Benign (s = 0.139)</i>            | - | <i>Deleterious (s = 0.000)</i>                  |
| rs771248119                         | chr4:46736959  | -                                    | - | -                                               |
| S: score or level of pathogenicity. |                |                                      |   |                                                 |
| - : Unreported.                     |                |                                      |   |                                                 |
